# Supplementary material for: Estimating Benefits of Microtransit for Social Determinants of Health: A Social Return on Investment System Dynamics Model
Source: MDPI journal article supplement (doi:10.3390/systems11110538), 2023-11-04
Supplement: s1 [file s1]

Table S1. Description of Variables

|                                                                                    | Variable                                 | Units        | Description                                                                                                        |
|------------------------------------------------------------------------------------|------------------------------------------|--------------|--------------------------------------------------------------------------------------------------------------------|
| <input type="checkbox"/>                                                           | Drivers(t)                               | People       | Number of drivers in the program                                                                                   |
| <input type="checkbox"/>                                                           | Potential Riders to Employment(t)        | People       | People in need of rides to employment who know about the program                                                   |
| <input type="checkbox"/>                                                           | Potential Riders to Healthcare(t)        | People       | People in need of rides to healthcare who know about the program                                                   |
| <input type="checkbox"/>                                                           | Potential Riders to Social Activities(t) | People       | People in need of rides to social activities who know about the program                                            |
| <input type="checkbox"/>                                                           | Riders to Employment(t)                  | People       | People who use rides to employment                                                                                 |
| <input type="checkbox"/>                                                           | Riders to Healthcare(t)                  | People       | People who use rides to healthcare                                                                                 |
| <input type="checkbox"/>                                                           | Riders to Social Activities(t)           | People       | People who use rides to employment                                                                                 |
| <input type="checkbox"/>                                                           | Staff(t)                                 | People       | People who use rides to employment                                                                                 |
| <input type="checkbox"/>                                                           | Unaware Emp Riders(t)                    | People       | People in need of rides to employment who don't know about the program                                             |
| <input type="checkbox"/>                                                           | Unaware HC Riders(t)                     | People       | People in need of rides to healthcare who don't know about the program                                             |
| <input type="checkbox"/>                                                           | Unaware Social Riders(t)                 | People       | People in need of rides to social activities who don't know about the program                                      |
|  | Drivers Leaving the Program              | People/Years | Drivers who get laid off due to an excess of drivers                                                               |
|  | Emp riders becoming aware                | People/Years | People in need of rides to employment and unaware the program who become aware each year                           |
|  | Emp Riders Joining                       | People/Years | People who join the program for employment rides each year                                                         |
|  | Emp Riders Leaving                       | People/Years | People who used the program for employment rides but leave the program due to decline in service quality           |
|  | HC Riders Joining                        | People/Years | People who join the program for healthcare rides each year                                                         |
|  | HC Riders Leaving                        | People/Years | People who used the program for healthcare rides but leave the program due to lack of service quality              |
|  | HC riders who become aware               | People/Years | People in need of rides to employment and unaware the program who become aware each year                           |
|  | Hiring New Drivers                       | People/Years | Number of drivers who get hired each year                                                                          |
|  | Hiring New Staff                         | People/Years | Number of staff who get hired each year                                                                            |
|  | Soc Riders Joining                       | People/Years | People who join the program for rides to social activities each year                                               |
|  | Soc Riders Leaving                       | People/Years | People who used the program for rides to social activities but leave the program due to decline in service quality |

|    |                                     |                     |                                                                                                             |
|----|-------------------------------------|---------------------|-------------------------------------------------------------------------------------------------------------|
| ⚙️ | Soc riders who become aware         | People/Years        | People in need of rides to social activities and unaware the program who become aware each year             |
| ⚙️ | Staff Layoff                        | People/Years        | Number of staff who get laid off each year due to an excess of staff                                        |
| ○  | Annual Insurance Cost per Vehicle   | US Dollars/Year     | Annual insurance cost of each vehicle                                                                       |
| ○  | Average Layoff Delay                | Year                | Time gap between realizing excess drivers or staff and laying them off                                      |
| ○  | Average Vehicle MPG                 | Miles/Gallon        | The fuel economy of vehicles                                                                                |
| ○  | Avg Driver's Salary                 | US Dollar Per Year  | Average salary paid to each driver                                                                          |
| ○  | Avg Fuel Use per Ride               | Gallons             | Average fuel use of each ride                                                                               |
| ○  | Avg Maintenance Cost per Vehicle    | US Dollar/Years     | Average cost of 1 vehicle maintenance cost per year                                                         |
| ○  | Avg Request for EMP Rides per Rider | Requests/Year       | Average number of rides to employment requested by one person per year                                      |
| ○  | Avg Request for HC Rides per Rider  | Requests/Year       | Average number of rides to healthcare requested by one person per year                                      |
| ○  | Avg Request for Soc Rides per Rider | Requests/Year       | Average number of rides to social activities requested by one person per year                               |
| ○  | Avg Staff's Salary                  | US Dollars Per Year | Average salary of customer representative staff                                                             |
| ○  | Avg Trip Distance                   | Miles               | Average distance of all trips                                                                               |
| ○  | Avg Vehicle Price                   | US Dollars Per Year | Average price of buying 1 vehicle                                                                           |
| ○  | Awareness Raising Capacity          | dmnl                | The percentage of individuals requiring rides that a single person can effectively inform about the program |
| ○  | Cost                                | US Dollars Per Year | Total cost of program per year                                                                              |
| ○  | Customer Service Quality            | Percent/100         | Quality of customer service of the program                                                                  |
| ○  | Drivers Hired                       |                     | Total number of drivers hired each year                                                                     |
| ○  | Drivers' Salary                     | US Dollars Per Year | Total salary paid to drivers each year                                                                      |
| ○  | Excess Drivers                      | People/Years        | Total number of excess drivers                                                                              |
| ○  | Excess Staff                        | People Per Year     | Total number of excess staff                                                                                |
| ○  | Fuel Cost                           | US Dollars Per Year | Total cost of fuel per year                                                                                 |
| ○  | Fuel cost per Gallon                | US Dollars Per Year | Cost of 1 gallon of fuel                                                                                    |
| ○  | Hiring time Gap                     | Year                | Time gap to hire new drivers                                                                                |

|   |                                |                             |                                                                                  |
|---|--------------------------------|-----------------------------|----------------------------------------------------------------------------------|
| ○ | Joining delay                  | Year                        | Time gap of people joining the program to become riders                          |
| ○ | Joining rate                   | dmnl                        | Percentage of people who know about the program and join the program each year   |
| ○ | Leaving Delay                  | Year                        | Time gap between quality decline and people leaving the program                  |
| ○ | Optimal Rider per staff        | People                      | Optimal number of persons a customer representative can respond to.              |
| ○ | Registration Cost              | US Dollar/Years             | Cost of registering a vehicle in Mississippi                                     |
| ○ | Regular Riders                 | People Per Year             | Total number of regular users in the program each year                           |
| ○ | Rent                           | US Dollars Per Year         | Total cost of office rent                                                        |
| ○ | Request for Rides              | Requests/Years              | Total number of rides requested each year                                        |
| ○ | Ride cap per driver            | Rides Per Year              | The maximum number of rides that each driver can participate in annually         |
| ○ | Riders' Tolerance Level        | dmnl                        | Rider's level of tolerance to not to leave the program when quality declines     |
| ○ | Rides                          | Rides/Years                 | The total number of rides facilitated by the program annually                    |
| ○ | Service Quality                | Percent/100                 | Service quality level in percent                                                 |
| ○ | Soc Value of Access to emp     | US Dollars/Years            | Proxy value of access to employment                                              |
| ○ | Soc Value of healthcare access | US Dollar Per Year          | Proxy value of access to healthcare                                              |
| ○ | Soc value of social inclusion  | US Dollar/Years             | Proxy value of access to social activities                                       |
| ○ | Social Benefit                 | US Dollar Per Year          | Total social benefits gained by stakeholders                                     |
| ○ | SROI                           | US Dollars Per \$1 Invested | SROI ratio of the program each year                                              |
| ○ | Staff Hired                    |                             | Total number of staff hired each year                                            |
| ○ | Staff Salary                   | US Dollars Per Year         | Total salary paid to staff each year                                             |
| ○ | Unattended Ride Rate           | Percent/100                 | The percentage of rides that are unattended to total rides requested             |
| ○ | Unattended Rides               | Rides Per Year              | Total number of rides that are unattended due to drivers' limit                  |
| ○ | Vehicle Purchase Tax Rate      | dmnl                        | Rate of tax that should be paid upon purchase of each vehicle                    |
| ○ | Vehicle Related Costs          | US Dollars Per Year         | Total cost related to vehicles (e.g., maintenance, purchase, registration, etc.) |
| ○ | Vehicles Purchased             | Cars Per Year               | Total number of vehicles purchased each year                                     |
